# Supplementary material
Source: HighWire-hosted journal article supplement (doi:10.1101/rna.080447.125)
Supplement: Supplemental_Documentation_S1.xlsx [file Supplemental_Documentation_S1.xlsx]

## Sheet: Down
		Gene list: Identified Human homologs of rrp4-G226D, rrp40-W195R, rrp46-L191H DOWN targets						GO Enrichment Biological process for identified Human homologs of rrp4-G226D, rrp40-W195R, rrp46-L191H DOWN targets
		Gene	Gene Name	Identifier				GO Term	GO Enrichment: Biological Process	p-value
		AARSD1	alanyl-tRNA synthetase domain containing 1	ENSG00000266967				GO:0019752	carboxylic acid metabolic process	2.55592e-17
		ADSL	adenylosuccinate lyase	ENSG00000239900				GO:0043436	oxoacid metabolic process	5.78221e-17
		ALDH1A1	aldehyde dehydrogenase 1 family member A1	ENSG00000165092				GO:0006082	organic acid metabolic process	1.19688e-16
		ALDH1A2	aldehyde dehydrogenase 1 family member A2	ENSG00000128918				GO:0006096	glycolytic process	1.01529e-14
		ALDH1A3	aldehyde dehydrogenase 1 family member A3	ENSG00000184254				GO:0006757	ATP generation from ADP	1.22e-14
		ALDH1B1	aldehyde dehydrogenase 1 family member B1	ENSG00000137124				GO:0046031	ADP metabolic process	4.87772e-14
		ALDH1L1	aldehyde dehydrogenase 1 family member L1	ENSG00000144908				GO:0016052	carbohydrate catabolic process	6.61231e-14
		ALDH1L2	aldehyde dehydrogenase 1 family member L2	ENSG00000136010				GO:0006165	nucleoside diphosphate phosphorylation	1.71228e-13
		ALDH2	aldehyde dehydrogenase 2 family member	ENSG00000111275				GO:0046939	nucleotide phosphorylation	1.98726e-13
		ASL	argininosuccinate lyase	ENSG00000126522				GO:0009135	purine nucleoside diphosphate metabolic process	3.54865e-13
		ATIC	5-aminoimidazole-4-carboxamide ribonucleotide formyltransferase/IMP cyclohydrolase	ENSG00000138363				GO:0009179	purine ribonucleoside diphosphate metabolic process	3.54865e-13
		BCAT1	branched chain amino acid transaminase 1	ENSG00000060982				GO:0006090	pyruvate metabolic process	5.39436e-13
		BCAT2	branched chain amino acid transaminase 2	ENSG00000105552				GO:0009185	ribonucleoside diphosphate metabolic process	1.20067e-12
		CTTN	cortactin	ENSG00000085733				GO:0006091	generation of precursor metabolites and energy	1.30852e-12
		DBN1	drebrin 1	ENSG00000113758				GO:0044281	small molecule metabolic process	1.688e-12
		DBNL	drebrin like	ENSG00000136279				GO:0009132	nucleoside diphosphate metabolic process	9.18763e-12
		EIF5A	eukaryotic translation initiation factor 5A	ENSG00000132507				GO:1901566	organonitrogen compound biosynthetic process	3.00018e-10
		EIF5A2	eukaryotic translation initiation factor 5A2	ENSG00000163577				GO:0006412	translation	1.41137e-09
		EIF5AL1	eukaryotic translation initiation factor 5A like 1	ENSG00000253626				GO:0032787	monocarboxylic acid metabolic process	1.50809e-09
		ENO1	enolase 1	ENSG00000074800				GO:0072521	purine-containing compound metabolic process	2.24587e-09
		ENO2	enolase 2	ENSG00000111674				GO:0043043	peptide biosynthetic process	3.27945e-09
		ENO3	enolase 3	ENSG00000108515				GO:0055086	nucleobase-containing small molecule metabolic process	4.10968e-09
		ENO4	enolase 4	ENSG00000188316				GO:0046034	ATP metabolic process	8.03116e-09
		GAPDH	glyceraldehyde-3-phosphate dehydrogenase	ENSG00000111640				GO:0002181	cytoplasmic translation	1.11331e-08
		GAPDHS	glyceraldehyde-3-phosphate dehydrogenase, spermatogenic	ENSG00000105679				GO:0019693	ribose phosphate metabolic process	1.18451e-08
		GCK	glucokinase	ENSG00000106633				GO:0043604	amide biosynthetic process	1.38432e-08
		GMPPB	GDP-mannose pyrophosphorylase B	ENSG00000173540				GO:0009117	nucleotide metabolic process	3.48008e-08
		GPI	glucose-6-phosphate isomerase	ENSG00000105220				GO:0006753	nucleoside phosphate metabolic process	4.46239e-08
		H2AB1	H2A.B variant histone 1	ENSG00000274183				GO:0006735	NADH regeneration	5.15151e-08
		H2AB3	H2A.B variant histone 3	ENSG00000277745				GO:0061621	canonical glycolysis	5.15151e-08
		H2AC1	H2A clustered histone 1	ENSG00000164508				GO:0061718	glucose catabolic process to pyruvate	5.15151e-08
		H2AC12	H2A clustered histone 12	ENSG00000274997				GO:0009150	purine ribonucleotide metabolic process	5.42095e-08
		H2AC13	H2A clustered histone 13	ENSG00000196747				GO:0005975	carbohydrate metabolic process	1.00317e-07
		H2AC14	H2A clustered histone 14	ENSG00000276368				GO:0009259	ribonucleotide metabolic process	1.10771e-07
		H2AC19	H2A clustered histone 19	ENSG00000288859				GO:0006163	purine nucleotide metabolic process	1.6583e-07
		H2AC20	H2A clustered histone 20	ENSG00000184260				GO:0061620	glycolytic process through glucose-6-phosphate	1.89887e-07
		H2AC21	H2A clustered histone 21	ENSG00000184270				GO:0006518	peptide metabolic process	2.55806e-07
		H2AC6	H2A clustered histone 6	ENSG00000180573				GO:0061615	glycolytic process through fructose-6-phosphate	3.31069e-07
		H2AC7	H2A clustered histone 7	ENSG00000196866				GO:0019674	NAD metabolic process	5.21009e-07
		H2AC8	H2A clustered histone 8	ENSG00000277075				GO:0006734	NADH metabolic process	6.84263e-07
		H2AJ	H2A.J histone	ENSG00000246705				GO:0043603	cellular amide metabolic process	1.32788e-06
		H2AL3	H2A.L variant histone 3	ENSG00000229674				GO:0044283	small molecule biosynthetic process	2.83399e-06
		H2AP	H2A.P histone	ENSG00000187516				GO:0006007	glucose catabolic process	2.93702e-06
		H2AW	H2A.W histone	ENSG00000181218				GO:0019318	hexose metabolic process	7.68442e-06
		H2AX	H2A.X variant histone	ENSG00000188486				GO:0051156	glucose 6-phosphate metabolic process	1.07702e-05
		HCLS1	hematopoietic cell-specific Lyn substrate 1	ENSG00000180353				GO:0044282	small molecule catabolic process	1.36839e-05
		HK1	hexokinase 1	ENSG00000156515				GO:0006006	glucose metabolic process	1.4381e-05
		HK2	hexokinase 2	ENSG00000159399				GO:1901575	organic substance catabolic process	1.44205e-05
		HK3	hexokinase 3	ENSG00000160883				GO:0005996	monosaccharide metabolic process	1.65802e-05
		HKDC1	hexokinase domain containing 1	ENSG00000156510				GO:1901564	organonitrogen compound metabolic process	3.28708e-05
		MACROH2A1	macroH2A.1 histone	ENSG00000113648				GO:0046394	carboxylic acid biosynthetic process	0.000106457
		MACROH2A2	macroH2A.2 histone	ENSG00000099284				GO:0019320	hexose catabolic process	0.000113949
		MDH2	malate dehydrogenase 2	ENSG00000146701				GO:0016053	organic acid biosynthetic process	0.000114957
		MECR	mitochondrial trans-2-enoyl-CoA reductase	ENSG00000116353				GO:1901135	carbohydrate derivative metabolic process	0.000140007
		MRAS	muscle RAS oncogene homolog	ENSG00000158186				GO:0043648	dicarboxylic acid metabolic process	0.000159468
		NAGS	N-acetylglutamate synthase	ENSG00000161653				GO:0046653	tetrahydrofolate metabolic process	0.000218463
		PGK1	phosphoglycerate kinase 1	ENSG00000102144				GO:0046365	monosaccharide catabolic process	0.000235694
		PGK2	phosphoglycerate kinase 2	ENSG00000170950				GO:0019637	organophosphate metabolic process	0.000236444
		PRKAB1	protein kinase AMP-activated non-catalytic subunit beta 1	ENSG00000111725				GO:0009056	catabolic process	0.000367075
		PRKAB2	protein kinase AMP-activated non-catalytic subunit beta 2	ENSG00000131791				GO:0034641	cellular nitrogen compound metabolic process	0.000370109
		PSAT1	phosphoserine aminotransferase 1	ENSG00000135069				GO:0008652	cellular amino acid biosynthetic process	0.000408786
		PYGB	glycogen phosphorylase B	ENSG00000100994				GO:0009058	biosynthetic process	0.000413834
		PYGL	glycogen phosphorylase L	ENSG00000100504				GO:0034645	cellular macromolecule biosynthetic process	0.0005478
		PYGM	glycogen phosphorylase, muscle associated	ENSG00000068976				GO:0046835	carbohydrate phosphorylation	0.00106043
		QPRT	quinolinate phosphoribosyltransferase	ENSG00000103485				GO:0006760	folic acid-containing compound metabolic process	0.00199272
		RACK1	receptor for activated C kinase 1	ENSG00000204628				GO:1901576	organic substance biosynthetic process	0.00316369
		RERG	RAS like estrogen regulated growth inhibitor	ENSG00000134533				GO:0042558	pteridine-containing compound metabolic process	0.00488291
		RIT1	Ras like without CAAX 1	ENSG00000143622				GO:0045901	positive regulation of translational elongation	0.00565959
		RIT2	Ras like without CAAX 2	ENSG00000152214				GO:0045905	positive regulation of translational termination	0.00565959
		RPL15	ribosomal protein L15	ENSG00000174748				GO:0044237	cellular metabolic process	0.00605987
		RPL24	ribosomal protein L24	ENSG00000114391				GO:1901607	alpha-amino acid biosynthetic process	0.00626916
		RPL3	ribosomal protein L3	ENSG00000100316				GO:0044238	primary metabolic process	0.00856445
		RPL30	ribosomal protein L30	ENSG00000156482				GO:0042593	glucose homeostasis	0.0312767
		RPL3L	ribosomal protein L3 like	ENSG00000140986				GO:0033500	carbohydrate homeostasis	0.0325543
		RPL4	ribosomal protein L4	ENSG00000174444				GO:0043933	protein-containing complex organization	0.0381789
		RPS13	ribosomal protein S13	ENSG00000110700				GO:0071704	organic substance metabolic process	0.0469424
		RPS2	ribosomal protein S2	ENSG00000140988
		RPS20	ribosomal protein S20	ENSG00000008988
		RPS27A	ribosomal protein S27a	ENSG00000143947
		RPS27AP5	ribosomal protein S27a pseudogene 5	ENSG00000231767
		RPS29	ribosomal protein S29	ENSG00000213741
		RPS3	ribosomal protein S3	ENSG00000149273
		RRAS	RAS related	ENSG00000126458
		RRAS2	RAS related 2	ENSG00000133818
		SHMT1	serine hydroxymethyltransferase 1	ENSG00000176974
		SHMT2	serine hydroxymethyltransferase 2	ENSG00000182199
		UBA52	ubiquitin A-52 residue ribosomal protein fusion product 1	ENSG00000221983
		UBB	ubiquitin B	ENSG00000170315
		UBC	ubiquitin C	ENSG00000150991
		Gene	Gene Name	Identifier
		ANAPC10	anaphase promoting complex subunit 10	ENSG00000164162
		CD2BP2	CD2 cytoplasmic tail binding protein 2	ENSG00000169217
		NAA40	N-alpha-acetyltransferase 40, NatD catalytic subunit	ENSG00000110583
		RPL18	ribosomal protein L18	ENSG00000063177
		SNAP23	synaptosome associated protein 23	ENSG00000092531
		SNAP25	synaptosome associated protein 25	ENSG00000132639
		SNAP29	synaptosome associated protein 29	ENSG00000099940
		SNAP47	synaptosome associated protein 47	ENSG00000143740
		TADA2A	transcriptional adaptor 2A	ENSG00000276234
		TADA2B	transcriptional adaptor 2B	ENSG00000173011
		TBCD	tubulin folding cofactor D	ENSG00000141556
		TOLLIP	toll interacting protein	ENSG00000078902
		UBE2V1	ubiquitin conjugating enzyme E2 V1	ENSG00000244687
		UBE2V2	ubiquitin conjugating enzyme E2 V2	ENSG00000169139

## Sheet: Up
		Gene list: Identified Human homologs of rrp4-G226D, rrp40-W195R, rrp46-L191H UP targets					GO Enrichment Biological process for identified Human homologs of rrp4-G226D, rrp40-W195R, rrp46-L191H UP targets
		Gene	Gene Name	Identifier			GO Term	GO Enrichment: Biological Process	p-value
		ANAPC10	anaphase promoting complex subunit 10	ENSG00000164162			GO:0016082	synaptic vesicle priming	1.72275e-05
		CD2BP2	CD2 cytoplasmic tail binding protein 2	ENSG00000169217			GO:0031629	synaptic vesicle fusion to presynaptic active zone membrane	2.04563e-05
		NAA40	N-alpha-acetyltransferase 40, NatD catalytic subunit	ENSG00000110583			GO:0099500	vesicle fusion to plasma membrane	2.40647e-05
		RPL18	ribosomal protein L18	ENSG00000063177			GO:0048499	synaptic vesicle membrane organization	4.27228e-05
		SNAP23	synaptosome associated protein 23	ENSG00000092531			GO:0140029	exocytic process	0.00131276
		SNAP25	synaptosome associated protein 25	ENSG00000132639			GO:0006906	vesicle fusion	0.0036238
		SNAP29	synaptosome associated protein 29	ENSG00000099940			GO:0016079	synaptic vesicle exocytosis	0.00395617
		SNAP47	synaptosome associated protein 47	ENSG00000143740			GO:0090174	organelle membrane fusion	0.00407114
		TADA2A	transcriptional adaptor 2A	ENSG00000276234			GO:0099504	synaptic vesicle cycle	0.00534836
		TADA2B	transcriptional adaptor 2B	ENSG00000173011			GO:0048284	organelle fusion	0.00904214
		TBCD	tubulin folding cofactor D	ENSG00000141556			GO:0007269	neurotransmitter secretion	0.00964866
		TOLLIP	toll interacting protein	ENSG00000078902			GO:0099643	signal release from synapse	0.00964866
		UBE2V1	ubiquitin conjugating enzyme E2 V1	ENSG00000244687			GO:0061025	membrane fusion	0.0141327
		UBE2V2	ubiquitin conjugating enzyme E2 V2	ENSG00000169139			GO:0099003	vesicle-mediated transport in synapse	0.0211945
							GO:0006836	neurotransmitter transport	0.0281238
							GO:0001505	regulation of neurotransmitter levels	0.0302844
							GO:0045055	regulated exocytosis	0.0433279
